# Supplementary material
Source: PubMed Central journal article supplement (PMC8448943)
Supplement: NIHMS1721800-supplement-1.pdf [file NIHMS1721800-supplement-1.pdf]

SUPPLEMENTAL MATERIALS

**Supplemental Table:** Comparison of physician-adjudicated definite AND possible stroke, self-reported stroke, and overt and covert MRI-defined vascular brain injury, for American Indian participants of the Strong Heart Study (2010-2013)

|                                                                                   |             | Possible Adjudicated stroke |            |
|-----------------------------------------------------------------------------------|-------------|-----------------------------|------------|
|                                                                                   |             | (Yes) N=40                  | (No) N=777 |
| Self-reported stroke                                                              | (Yes) N=68  | 26                          | 14         |
|                                                                                   | (No) N=749  | 42                          | 735        |
| Sensitivity 65.0%, specificity 94.6%, correct classification 93.2%, ROC area 0.80 |             |                             |            |
| MRI-defined vascular findings <sup>‡</sup>                                        | (Yes) N=287 | 26                          | 261        |
|                                                                                   | (No) N=530  | 14                          | 516        |
| Sensitivity 65.0%, specificity 66.4%, correct classification 66.3%, ROC area 0.66 |             |                             |            |

<sup>‡</sup>MRI-defined cerebral vascular injury includes cerebral infarct, hemorrhage

SUPPLEMENTAL MATERIALS

**Supplemental Figure:** Comparing vascular brain injury and overt clinical stroke with physical function test scores and age, for American Indians in the Strong Heart Study (2010-2013)

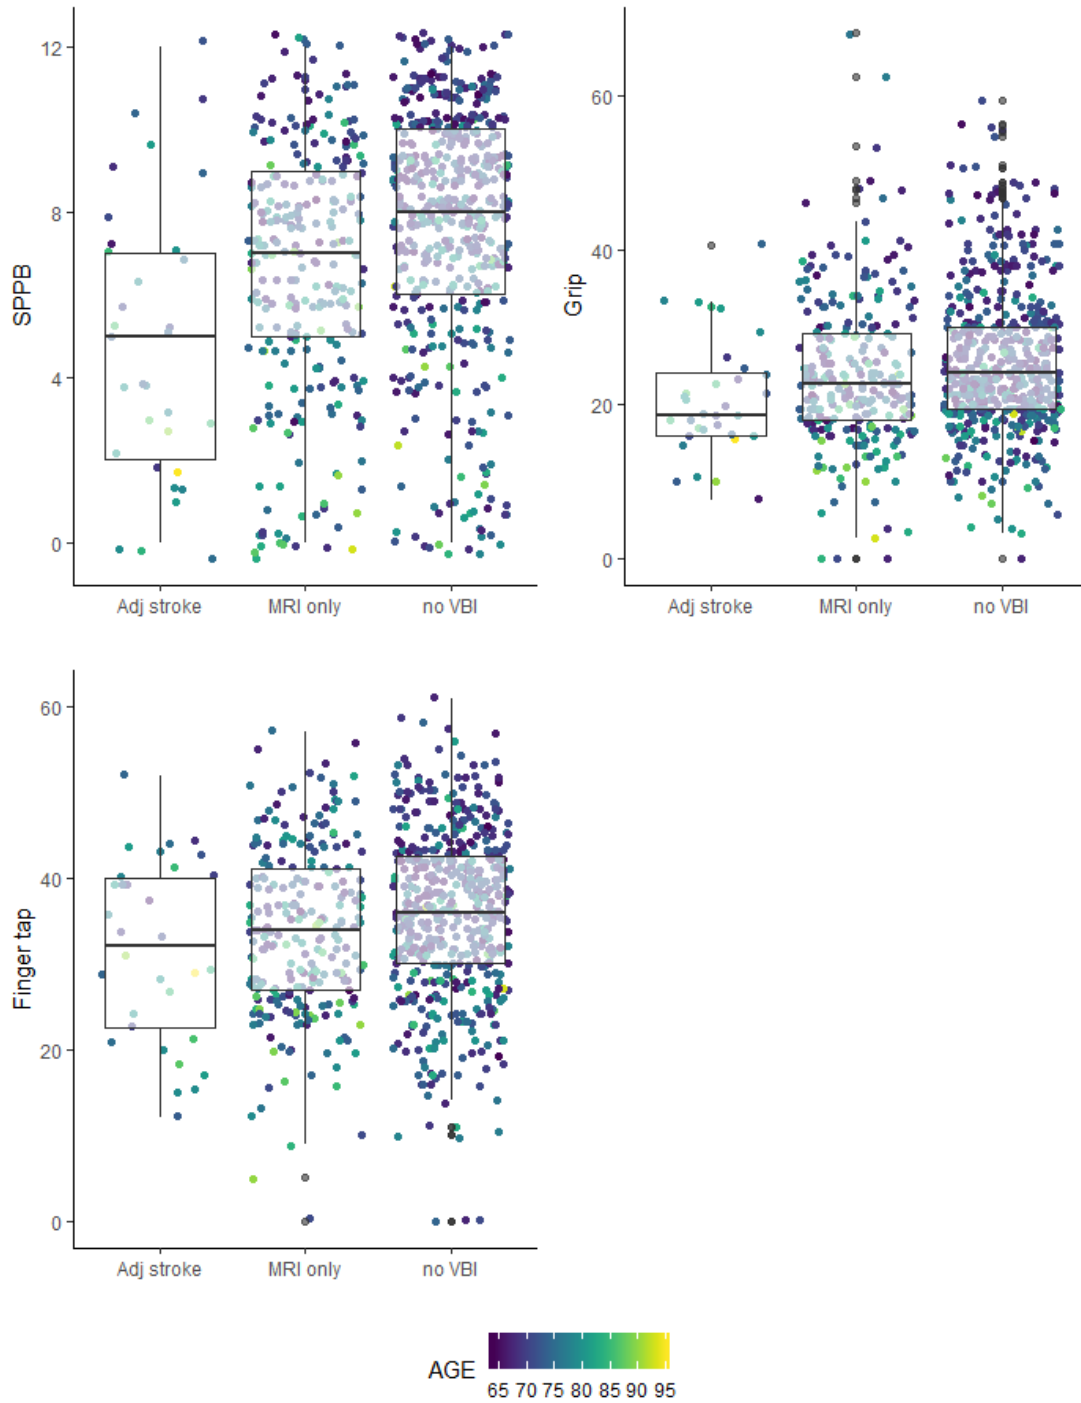

**Legend:** Bar charts and dot plots for cognitive test scores for Short Physical Performance Battery (SPPB; lower body motor control), grip strength test (Grip; upper body motor control), and Halstead finger tapping test (finger tap; fine motor control) – Y axes – over categories of vascular injury, including those without overt or covert VBI (N=398), those with covert VBI, MRI defined (N=386), and those with overt VBI, adjudicated stroke (N=33) – X axes. Coloration by age, with youngest in dark purple and oldest in light green.
